# Supplementary material
Source: HighWire-hosted journal article supplement (https://cmaj.ca/highwire/filestream/78831/field_highwire_adjunct_files/3/201967-guide-4-at.pdf)
Supplement: 201967-guide-4-at.pdf [file 201967-guide-4-at.pdf]

Recommendation on screening for chlamydia and gonorrhoea in primary care for individuals not known to be at high risk – Appendix 4

**Appendix 4: Competing interests for clinical and content experts for the “Recommendation on screening for chlamydia and gonorrhoea in primary care for individuals not known to be at high risk” guideline**

Clinical and content experts disclose relevant interests at the outset of their participation and annually thereafter. The experts providing input on this guideline reported the following competing interests:

- Dr. Anne Burchell: no relevant interests
- Dr. Tom Wong: no relevant interests
- Dr. Ameeta Singh: interim chair for the Expert Working Group for the Canadian Guidelines on STIs at the time of engagement for the guideline
- Dr Jo-Anne Dillon: an advisory role to the World Health Organization (unpaid), Pan American Health organization (unpaid) and other national health organizations regarding STIs.

The task force did not judge any of these disclosures to represent conflicts of interest that precluded participation as a clinical or content expert.
